21

## 22 **Summary**

23       The nitrogen (N) cycle represents one of the most well studied systems yet the  
 24 taxonomic diversity of the organisms that contribute to it is mostly unknown, or  
 25 linked to poorly characterized microbial groups. While progress has allowed  
 26 functional groups to be refined, they still rely on *a priori* knowledge of enzymes  
 27 involved, and the assumption of functional conservation, with little connection to the  
 28 role the transformation plays for specific organisms. Here, we use soil microcosms to  
 29 test the impact of N deposition on prokaryotic communities. By combining chemical,  
 30 genomic and transcriptomic analysis we are able to identify and link changes in  
 31 community structure to specific organisms catalyzing given chemical reactions. Urea  
 32 deposition led to a decrease in prokaryotic richness, and a shift in community  
 33 composition. This was driven by replacement of stable native populations, which  
 34 utilize energy from N-linked redox reactions for maintenance, with fast responding  
 35 populations that use this energy for growth. This model can be used to predict  
 36 response to N disturbances and allows us to identify putative life strategies of  
 37 different functional, and taxonomic, groups thus providing insights into how they  
 38 persist in ecosystems by niche differentiation.

39

40

## 41 **Introduction**

42       Modern microbiological techniques have given us unprecedented access to the  
43 microbial world (Spiro, 2012; Rinke *et al.*, 2013), yet soil communities remain poorly  
44 understood (Delmont *et al.*, 2015). While many studies have focused on the diversity  
45 or abundance of key populations (Taylor *et al.*, 2012; Gubry-Rangin *et al.*, 2015; Wei  
46 *et al.*, 2015), fewer have looked at the transcriptional profiles over time (Nicol *et al.*,  
47 2008; Morales and Holben, 2013), and even less have done so for multiple groups at  
48 the same time (Liu *et al.*, 2010; 2014; Brenzinger *et al.*, 2015). This is particularly  
49 true of organisms involved in nitrogen (N) cycling in soils. The complexity of the  
50 underlying processes combined with the diversity of microbes contributing to each  
51 process provides a large challenge to identifying mechanisms active at any given time  
52 (Butterbach-Bahl *et al.*, 2013). Currently we lack enough information to understand  
53 basic ecological concepts linked to N cycling *in situ* such as: i) substrate competition  
54 at both inter and intra species level, ii) full diversity of both present and active N  
55 cycling populations, iii) and the life strategies of these populations which in turn  
56 control their responses (both as observed growth or transcriptional changes).

57       Where progress has been made, groundbreaking findings have followed. The  
58 initial discovery of ammonia oxidizing archaea (AOA) and its subsequent rise to  
59 major player in the N cycle (Leininger *et al.*, 2006; Hatzenpichler, 2012; Stahl and la  
60 Torre, 2012) highlighted the unexpected gaps in knowledge. Later studies have  
61 suggested different life strategies for AOA when compared to ammonia oxidizing  
62 bacteria (AOB) (Sterngren *et al.*, 2015), but this may be complicated by variance  
63 across strains (Bayer *et al.*, 2015). One major unknown is whether observations made  
64 in studies, or organisms, from one ecosystem translate to others.

It is well established that individual intermediates in the N cycle can be used for specific reasons (i.e. ammonia oxidation provides electrons, while denitrification intermediates accept reducing equivalents), but the purpose of the reactions for any organism is another major unknown. That is, while some organisms carry out these processes for electrogenic purposes that can result in growth, others do it in order to maintain redox homeostasis (Simon and Klotz, 2013). Unfortunately examples where an organism harbours multiple versions of the same enzyme for completely different purposes (respiration vs. redox balance) exist (Hartsock and Shapleigh, 2011), and are likely to limit generalizations.

Despite this, studies focusing on population changes in response to manipulations have consistently recorded conserved patterns (e.g. growth of AOB but not AOA (Jia and Conrad, 2009; Di *et al.*, 2009; Pratscher *et al.*, 2011)) suggesting that responses by specific populations in a given location or ecosystem are predictable. However, the debate continues on whether niche specialization and differentiation can be determined based solely on correlations, without analyzing the wider array of processes that contribute or influence any given N transformation (Prosser and Nicol, 2012). This is relevant in ecosystems such as agricultural grassland where an understanding of N cycling is crucial for management of both productivity and greenhouse gases (Herrero *et al.*, 2016), of which nitrous oxide (N<sub>2</sub>O) is a key player (Reay *et al.*, 2012).

In grazed pastures (i.e. agricultural grasslands) N deposition through ruminant urine drives the emissions of N<sub>2</sub>O (Saggar *et al.*, 2013). In this system a full cascade of transformations begin with urea and can result in accumulation of any intermediate depending on conditions, but with a final end product of N<sub>2</sub> or N<sub>2</sub>O. While the chemical transformations have been explored (Hamonts *et al.*, 2013; Baral *et al.*,

2014; de Klein, Shepherd, *et al.*, 2014; de Klein, Luo, *et al.*, 2014), mechanistic understanding of the populations catalyzing the reactions, and the purpose they serve for the organisms is less clear. In this study we aimed to identify active biochemical pathways involved in N loss (through gases) in response to urea (simulated ruminant urine deposition event) and varying moisture content. Observed phenotypes (chemical transformations) were linked to changes in genotype (functional potential through DNA; a proxy for population changes), expression of genotype (RNA profiles), and total community composition (specific taxonomically defined populations based on 16S). We hypothesized that sequential transformation of nitrogenous intermediates would be coupled to changes in expression of functional genes catalyzing production and consumption of intermediates. Alternatively, transformations not linked to population, or expression changes, would be driven by other (non-biochemical) pathways. We also hypothesized that changes in transcription, or population size, could serve to determine life strategies of microbes utilizing each intermediate (whether they are used for growth vs. maintenance). To test this we mimicked a ruminant urine-N deposition event using repacked soil cores ( $1.1 \text{ mg m}^{-3}$ ) on tension tables monitored for 63 days. Soils were treated with urea under two different moisture contents: high (near saturation; -1.0 kPa) and low (field capacity; -10 kPa) moisture. Simultaneous measurements of soil chemistry, gas kinetics, microbial community composition (by 16S amplicon sequencing) and functional gene abundance (for nitrification and denitrification) at DNA (gene) and RNA (transcript) levels were performed to determine the active populations and pathways.

113 1.

## 114 **Results:**

### 115 *Soil pH and N transformation dynamics in response to urea*

116 Soil pH increased from acidic (pH = 5.5) to alkaline reaching a maximum (pH  
117 = 8.5) at day 3 in urea treated soils. Return to baseline pH was modulated by soil  
118 moisture with high moisture (HM; -1.0kPa) soil reaching baseline at day 35 and low  
119 moisture soils (LM; -10kPa) doing so at day 53 (Fig. 1). This shift in pH was linked to  
120 a successive N transformation process initiated with urea hydrolysis and leading to  
121 nitrification and denitrification: urea  $\rightarrow$   $\text{NH}_4^+$   $\rightarrow$   $\text{NO}_2^-$   $\rightarrow$   $\text{NO}_3^-$   $\rightarrow$   $\text{N}_2\text{O}$   $\rightarrow$   $\text{N}_2$  (Fig. 1).  
122 Sequential peak activity was observed for each transformation with the response  
123 modified by moisture. Maximum production (mean  $\mu\text{g N g}^{-1}$  soil) for each  
124 transformation was observed at day 3, 21 and 35 respectively for  $\text{NH}_4^+$  (HM+N =  
125 1758; LM+N= 1730),  $\text{NO}_2^-$  (HM+N = 79.2; LM+N= 39.7) and  $\text{NO}_3^-$  (HM+N = 429.2;  
126 LM+N= 335). Two distinct production peaks were observed for  $\text{N}_2\text{O}$ , with a short  
127 pulse (0 to 5 days) reaching a maximum at day 2 for HM soils ( $11602.8 \mu\text{g m}^{-2} \text{h}^{-1}$ )  
128 and day 3 for LM soils ( $46.8 \mu\text{g m}^{-2} \text{h}^{-1}$ ) (Fig. 1 and Supplementary Fig. S1). A  
129 second, longer duration (10 to ~50 days),  $\text{N}_2\text{O}$  pulse reached a maximum at day 28 for  
130 HM soils ( $6405.1 \mu\text{g m}^{-2} \text{h}^{-1}$ ) and day 30 for LM soils ( $448.9 \mu\text{g m}^{-2} \text{h}^{-1}$ ). The large  
131  $\text{N}_2\text{O}$  spike (first peak) between days 0 to 5 in the HM+N treatment was about 11.6%  
132 of the total  $\text{N}_2\text{O}$  cumulative flux over 63 days, whereas in the LM+N treatment the 0  
133 to 5 day periods accounted for 22.3% of the total  $\text{N}_2\text{O}$  cumulative flux over 63 days.

134

### 135 *Population and transcription dynamics for nitrogen related functional groups*

Significant changes (ANOVA,  $p < 0.05$ ) in relative activity (mRNA copy numbers/16S rRNA gene copy numbers) were observed promptly between day 0 & 3 for all functional groups (except AOA and N-fixers in HM soil) in response to urea (Fig. 1). However, maximum relative transcription did not match maximum production peaks for corresponding substrates, or products, for each functional group. Nitrifiers (ammonia oxidizers) displayed niche differentiation, with time, length and strength of response differing between bacterial (AOB) and archaeal ammonia oxidizers (AOA). Relative activity of AOA increased (4.6-fold for LM and 1.6-fold for HM) under urea treatments at day 3 only, with a subsequent decrease (-19.3-fold for LM and -7-fold for HM) resulting in lower expression than in untreated soils (Fig. 1). AOB relative activity also increased but was sustained for a much longer period (3-63 days), with maximum activity (>11-fold change) seen at 21 and 35 days for HM+N and LM+N respectively (Fig. 1). Denitrifiers (both nitrite and nitrous oxide reducers) showed similar responses as AOA, with peak activity at day 3 and a rapid return to baseline, in the case of nitrite reducers decreasing to levels below those observed in non-urea treated soils (Fig. 1). To account for endogenous sources of N,  $N_2$  fixers were monitored through the activity of the nitrogenase gene (*nifH*). No significant changes were observed except for day 3 (LM +N only), with a subsequent decrease in activity below background. This decrease below background was observed for all N treated samples.

Changes in the relative contribution to total community composition were calculated by normalizing functional gene copy numbers to total 16S rRNA gene copy numbers per sample for each functional group (Fig. 1). The maximum observed relative abundance of each functional group differed for each group (HM and LM respectively): AOB, 19 & 12 %; AOA, 8 & 13 %; *nirS*, 6.3 & 2.9 %; *nosZI*, 3.3 & 3.4

%; *nifH*, 4.7 & 4.32 %. Further, large population changes over time were mostly limited to AOB. Generally, AOB comprised <1 % of the total community, but in response to urea increased up to 29-fold to make up 19 % (day 21 for HM) and 20-fold to make up 12 % (day 35 for LM) of the community in urea treated soils. In contrast, AOA were found at consistently high levels (median=4.2 %) in untreated soils, but numbers decreased >7-fold in response to urea (~1.3 % at least 63 day). Similarly, other functional groups (*nosZI*, *nifH*) decreased or remained stable (*nirS*) in response to urea. Similar patterns for both activity and population changes were observed when absolute values were analyzed (Supplementary Fig. S2).

*N deposition induces both a genotypic and a transcriptional response at the community level that is modified by soil moisture content*

Urea deposition imposed a general negative selective pressure leading to decreases in OTU level prokaryotic diversity (Shannon, -1.2-fold change) and richness (-1.5-fold change) at DNA level (Fig. 2a, Supplementary Fig. S3). The same pattern was observed when active microbes (based on RNA) were analyzed with decreases in OTU level prokaryotic diversity (Shannon, -1.3-fold change) and richness (-1.9-fold change). Moisture was found to play a modifier role, with LM samples consistently resulting in lower diversity and richness when compared to their HM pairs. Richness and diversity losses were not recovered even after 63 days. In contrast, samples where no urea was applied remained stable (i.e. constant diversity and richness).

Urea deposition significantly altered community structure as shown in a non-metric multidimensional scaling (NMDS) plot using a Bray-Curtis dissimilarity



matrix (Fig. 2b and Supplementary Fig. S4). At both DNA and RNA level community changes along the first axis corresponded with changes in response to urea treatment, with the second axis accounting for changes in moisture. A pvclust analysis (hierarchical clustering with p-values calculated via multiscale bootstrap resampling, Supplementary Fig. S5) confirmed two major clusters [100% AU (Approximately Unbiased) and 100% BP (Bootstrap Probability)] formed by urea treated (HM+N and LM+N samples, excluding day 0), vs. untreated soils (HM-N, LM-N, field samples, and HM+N & LM+N at Day 0). Temporal variance within each cluster was confirmed using a Mantel correlogram analysis (Fig. 2c). Urea treated samples had significant changes in community composition immediately upon treatment (Day 0 to 7), with no return to baseline conditions by the end of the experiment. In contrast, untreated samples did not change significantly over time (Supplemental Fig. S6)

Changes in community structure were associated with shifts in major taxonomic lineages (Fig. 3). In general, phylum level changes in abundance and transcription were correlated to each other (Supplementary Table S2 and Fig. S7, S8). Urea deposition induced temporal changes in phylum level abundance with observed maximum fold changes per group (HM & LM at DNA level) being: Acidobacteria, -4.6 & -3.7; Actinobacteria, 2.4 & 5.3; Bacteroidetes, 4.6 & 2.2; Candidate Division WS3, -10.5 & -7; Chloroflexi, -2.9 & -2.6; Firmicutes, 10.8 & 16.2; Gemmatimonadetes, 2 & 3.3; Nitrospirae, -3.2 & -2; Planctomycetes, -3.7 & -2.5; Thaumarchaeota, -5.2 & -3.6; Verrucomicrobia, -2.5 & -2; Alphaproteobacteria, 1.4 & 1.7; Betaproteobacteria, 4 & 2; Deltaproteobacteria, -2.2 & -1.4; Gammaproteobacteria, 1.5 & 2.6. Normalized transcriptional activity (reads of 16S rRNA/reads of 16S rDNA) identified the Firmicutes and members within classes of the Proteobacteria as the most transcriptionally active. While abundant phyla tended

to have high levels of normalized transcription, less abundant organisms like the Thaumarchaeota, were observed to have high normalized transcriptional activity especially under background conditions (Supplementary Fig. S7). In contrast, groups traditionally considered slow growers (e.g. Nitrospirae and Gemmatimonadetes) had low normalized transcription. It was also noted that while normalized transcription levels remained stable without urea, N deposition induced changes. These changes in normalized activity did not always match trends observed at individual DNA or RNA level (e.g. Firmicutes).

*Shifts in N and moisture status trigger OTU response linked to divergent life strategies*

Since Fig. 3 only represents a taxonomic summary of all OTUs (irrespective of their response to treatments), it does not provide a clear indication of who is changing and why. To account for this, urea responsive OTUs were identified independently in RNA and DNA profiles (under each treatment) through a SIMPER analysis. OTUs accounting for 50% of the variance were analyzed (Fig. 4). Response patterns for detected OTUs were conserved between RNA and DNA profiles. However, while some OTUs responded similarly to urea under varying moisture conditions, marked differences were observed with no detectable pattern based on taxonomy.

OTUs within the Proteobacteria identified in the SIMPER analysis did not display a conserved response to urea, however when lower taxonomic levels were examined patterns emerged. A consistent positive response was seen for OTUs within the class Betaproteobacteria and the family Hyphomicrobiaceae, amongst others.

Conserved positive responses to urea were also observed at the phylum level for the Firmicutes, Bacteroidetes, Actinobacteria, Gemmatimonadetes and Planctomycetes, although the level of response varied across lower taxonomic levels. In contrast, with only some exceptions, OTUs within the phyla Acidobacteria, Verrucomicrobia, Nitrospirae, Candidate Division WS3 (also referred to as candidate phylum Latescibacteria) and the Thaumarchaeota all were negatively impacted by urea deposition.

To account for response patterns over time, we focused on OTUs that accounted for 30% of the variance in the SIMPER analysis (36 total), with individual OTU contributions ranging from 5 to 0.1 percent at the DNA level and 5 to 0.06 percent at the RNA level (Table S3). Temporal patterns were conserved between DNA and RNA profiles (Supplementary Fig. S9, S10), despite differences in absolute abundance. Once again, moisture acted as a modulator of response with the extent of impact dependent on the OTU (Fig. 5 and 6). While most functional groups responded immediately (at both DNA and RNA level), positively affected OTU responses were observed along all time points creating a succession of positively selected organisms. In contrast, negatively affected OTUs all responded within the first 2 time points indicating an immediate negative selective pressure (Fig. 6). Large variances in absolute changes were observed, even within similar organisms (e.g. *Pedobacter*), with fold changes ranging from -10.5 to 410 across both positively and negatively affected OTUs. Despite this, OTU response was noted to correspond to taxonomy, with both the effect (positive or negative) and the extent of response (fold change or total abundance) in line with predicted ecological growth strategies (r vs. k) predicted for different taxa. To test this, we predicted rRNA operon copy numbers (rrn) for all 36 OTUs and compared them to the observed maximum abundance, max fold change

in population or observed growth rate per day. We consistently observed a non-linear response with an asymptote reached at higher copy numbers (Fig. 7). These trends were consistent independent of which moisture conditions were present at the time of response. To account for preferential response due to moisture, we selected the highest response for each organism and saw no clear difference in patterns. To account for potential biases due to uneven representation, OTUs were grouped into low (1-2 copies of *rrn*) or high (>2) copy number organisms (Supplementary Table S4). While significant changes ( $p < 0.05$ , Supplementary Fig. S11) were observed in most instances, exceptions were noted (e.g. growth rate under HM).

## Discussion

Functional profiling (identification and quantification of specific functional genes/transcripts) is normally utilized to link chemical transformations to specific microbial populations capable of catalyzing reactions. However, functional groups are comprised of taxonomically diverse species of microbes with different lifestyle strategies that are unlikely to share a conserved response to an ecosystem disturbance (Ho *et al.*, 2012). While functional profiling allows us to measure the net response of a functional group, and could serve as a proxy for determining the importance of the group in a sample, it does not identify how specific organisms benefit from a catalyzed transformation. Here we used a controlled microcosm experiment to measure the response of soil communities to a disturbance in the form of changes in moisture and nitrogen (urea) deposition. Functional analysis (qPCR) demonstrated a biological response to urea, but differing responses to moisture depending on group (Fig. 1). Responses are potentially linked to different life strategies amongst these groups. Ammonia oxidizers displayed contrasting population and expression profiles,

suggesting niche differentiation driven by time and/or substrate concentration. AOA responded early, and declined, as new N was made available while AOB responded later with population swings spanning from near detection limit to most dominant group. These observations match prior reports showing AOA prefer low N conditions, while AOB respond vigorously to N deposition (Di *et al.*, 2010; Sterngren *et al.*, 2015). This has been interpreted as evidence for differing lifestyles for AOB and AOA, with AOA preferring nutrient poor conditions and AOB dominating in rich ones (Sterngren *et al.*, 2015). However, prior assertions that AOB are solely important for driving nitrification might be overstated given that transcriptional activity for both groups is comparable if compared at peak time (Di *et al.*, 2009). This contrasting use of energy between functionally redundant organisms might explain the low correlations between processes and the abundance of their respective functional populations (Rocca *et al.*, 2015). When we examine the response of other functional groups benefiting from influxes of N, like denitrifiers, we see no significant change in population sizes suggesting that either energy is being utilized for maintenance or otherwise for redox balance (Hartsock and Shapleigh, 2011; Y. Li *et al.*, 2012; Dietrich *et al.*, 2013). In contrast, organism which benefit from low levels of N, like N fixers, decline in response to exogenous N demonstrating real time selective pressure in a complex ecosystem. These responses also highlight the temporal nature of these relationships and how by following niche differentiation high number of functionally redundant organisms can be maintained (Stempfhuber *et al.*, 2016).

Observations also highlight how lifestyle preferences for organisms are reflected in their dominance in the ecosystem. Prior work suggests that AOA dominate in soils with low N inputs, but AOB numbers are higher at times of high N loading or in ecosystems with consistent N deposition (Gong *et al.*, 2013; Sterngren *et*

*al.*, 2015; Venterea *et al.*, 2015; C. Li *et al.*, 2016). This would suggest that a dynamic ecosystem with varying nutrient levels would select for a higher diversity of organisms that maintain ecosystem processes stable over time and space (Wang and Loreau, 2014). Indeed, our data supports this with alpha diversity (calculated based on 16S amplicon analysis at both DNA and RNA) decreasing in response to urea. This is inconsistent with plant responses to nutrient deposition in which multiple resources need to be added to elicit a response (Harpole *et al.*, 2016), although contrasting results have been observed (Suding *et al.*, 2005; Bai *et al.*, 2010; Song *et al.*, 2011; 2012). For microbes, high site to site variance is reported (De Schrijver *et al.*, 2011; Leff *et al.*, 2015), but similar negative responses are suggested and could be linked to increased competition in the absence of natural ecosystem variability. However, links between microbial and plant response suggest interplay between the response of macro and microbiota (Zeng *et al.*, 2016). While previous work suggests an important role for moisture in controlling community composition (Waldrop and Firestone, 2006), we only observed a modifier role in our experiment.

Although broad observations align with ecological theory, precise identification of responsive organisms is rarely carried out. Here we note that while at phylum level clear responses (+/- fold change) are observed, variance is seen at the OTU level suggesting the intra-taxonomic diversity we hypothesized reflected the life history strategies of the organisms. Attempts to link specific transformations to organisms failed, potentially due to the succession of functionally redundant organisms that respond at different time with non-overlapping optima. That is, while functional gene abundance provides the population size of organisms capable of carrying out a process, the group may be composed of many OTUs with divergent life strategies or metabolic potentials that affect when they can respond. This makes

functional gene measurement an average of all OTU subpopulations carrying that gene. However, community response allows us to identify OTUs responsive to N deposition, which when analyzed independently, provides insights into metabolic preferences (i.e. aerobic vs. anaerobic, nitrifier vs. denitrifier) based on time and response to treatments. Taxonomic groups regularly recognized as native to, or abundant in, oligotrophic conditions declined in the presence of urea. Most of these groups are still poorly understood, and included the Acidobacteria, Verrucomicrobia, Nitrospirae, Candidate Division WS3 (also referred to as candidate phylum Latescibacteria) and the Thaumarchaeota. These organisms are predicted to be slow growers with the Thaumarchaeal response confirming the AOA patterns observed at the functional level. In contrast, positively responding organisms are those generally associated with groups considered eutrophic or capable of fast response. This discrepancy based on life history strategies has been proposed and applied to microbes previously, and suggests that an organisms' ability to grow, utilize carbon, generate proteins and efficiently transform resources to biomass, amongst others, is related to its rRNA operon copy number (Klappenbach *et al.*, 2000; Stevenson and Schmidt, 2004; Dethlefsen and Schmidt, 2007; Roller *et al.*, 2016). When applied to communities, it is associated with microbial successions in which decreases in copy numbers are associated with later stages of succession including in soils (Nemergut *et al.*, 2015). For example, two OTUs matching the Verrucomicrobial OTU DA101 where found to be negatively affected by urea, and at least one was found to be highly abundant under background conditions. DA101 seems to be a common soil (and grassland) organism identified throughout the world (Felske and Akkermans, 1998; O'Farrell and Janssen, 1999; Brewer *et al.*, 2016). Based on growth (Sangwan *et al.*, 2005) and genome reconstructions (Brewer *et al.*, 2016), these organisms are

predicted to be slow but efficient growers (k strategists). In contrast, most of the positively affected organisms seemed to possess higher rrn copy numbers and included members of the Proteobacteria and Bacteroidetes in line with prior predictions (Fierer *et al.*, 2007). Statistical analysis supported this interpretation with low copy numbers (1-2) significantly associated to a negative response to N deposition, while high copy numbers (>2) were linked to increased capacity for growth, growth rate and maximum abundance. However, we found a non-linear relationship between increased rrn copy numbers and growth capacity, best fitted by models reaching an asymptote (like Michaelis-Menten and logistic curves). These are first order models that suggest that while a benefit exists where increased copy numbers lead to increased growth rate, after a certain threshold other variables might limit any benefit. Alternatively, a decrease in growth rate might be observed with increasing copy numbers once a tradeoff threshold is passed (Lipson, 2015). However, when rrn copy numbers are log2 transformed, a significant linear fit was observed as seen in prior studies (Roller *et al.*, 2016). In our study these predictions are made complicated due to the observed intra-taxonomic variance that can arise from the lack of accurate knowledge of copy numbers for many organisms, or from metabolic plasticity at higher taxonomic levels. In addition, our analysis focused on N responsive organisms only, and with only 38 identified it indicates that most organisms were neither positively nor negatively affected. This could explain why certain organisms (e.g. Actinobacteria) expected to be k strategist, based on their ability to produce secondary metabolites (Abdelmohsen *et al.*, 2015) and compete with other organisms (Barka *et al.*, 2015), showed a positive response to N deposition. Alternatively, the low number of responsive organisms could indicate that our false discovery rate corrections were too restrictive.



These findings help us get closer to understanding not just the metabolic potential of organisms in soils, but the role specific pathways play for an organism. It also allows us to understand the repercussion of disturbances and management of soils on below ground biodiversity. The knowledge gained through these type of observations, and integration of life history strategies into microbial ecology, will get us one step closer to microbiome management as part of soil care.

## **Experimental procedure**

### *Sample collection and experimental design*

A detailed methodology can be found in (Clough *et. al.*, In review). In brief, soil (8°15'W, 52°9'N) was collected from a permanently grazed agricultural grassland (dairy pasture) in March (early spring) at the Teagasc Moorepark Research Centre, County Cork, Ireland. Soil was sampled after the turf was removed and a spade was used to randomly sample the A-horizon (5-20 cm depth, excluding grass layer). To avoid fresh N loading, fields had not been grazed for over a month. Field moist samples were immediately shipped to Lincoln University, New Zealand and kept at 4°C until processed. Prior to use, soil was sieved ( $\leq 2$  mm) to remove any stones, plant roots or earthworms and packed into stainless steel rings (7.3 cm internal diameter, 7.4 cm deep) to a depth of 4.1 cm at *in situ* soil bulk density ( $1.1 \text{ Mg m}^{-3}$  with a gravimetric water content ( $\theta_g$ ) of  $0.24 \text{ g water g}^{-1} \text{ soil}$ ). The resulting cores had a total porosity of  $0.58 \text{ cm}^3 \text{ pores cm}^{-3} \text{ soil}$  and were arranged in a factorial experiment replicated four times. Soil cores were maintained at two moisture contents: high (near saturated; -1.0 kPa) and low (field capacity; -10 kPa) moisture using tension tables (Romano *et al.*, 2002). These moisture contents, -1 and -10 kPa respectively, corresponded to 53% and 30% volumetric water content, or 91% and

52% water-filled pore space (WFPS). Nitrogen was applied as a urea solution at 2141 kg urea/ha dry soil (equivalent to a single urination event at the higher rate expected under bovine urine deposition of 1000 kg N ha<sup>-1</sup>). Four treatments in total were carried out (replicated four times each for a total of 112 cores analyzed) representing two levels of urea and two levels of moisture: urea + high moisture (HM +N; Urea \_- 1.0kPa), urea + low moisture (LM +N; Urea \_-10kPa), no urea + high moisture (HM -N; No Urea \_-1.0kPa) and no urea + low moisture (LM -N; No Urea\_-10kPa). All cores were held at 20°C for a period of 63 days.

#### *Soil pH, and inorganic-N measurements*

Soil pH was monitored throughout the experiment using a flat surface pH electrode (Broadley James Corp., Irvine, California). Inorganic N concentrations (NH<sub>4</sub><sup>+</sup>, NO<sub>2</sub><sup>-</sup>, NO<sub>3</sub><sup>-</sup>) were determined by destructively sampling batches of soil cores. Each core was homogenized and a subsample was extracted (10 g dry soil: 100 ml 2M KCl shaken for 1 hour), filtered (Whatman 42) and analyzed using flow injection analysis (Blakemore et al., 1987). N<sub>2</sub>O flux was determined by placing a soil core into a 1-L stainless steel tin fitted with a gas-tight lid and rubber septa. The headspace was sampled after 15 and 30 minutes and analyzed using an automated gas chromatograph (8610; SRI Instruments, Torrance, CA), linked to an autosampler (Gilson 222XL; Gilson, Middleton, WI) as previously described (Clough et al., 2006).

#### *Nucleic acids extraction*

Samples for RNA and DNA extraction were collected simultaneously with samples for inorganic N analysis, but only samples at 0, 7, 14, 21, 35, 63 days were processed for nucleic acids. Each biological replicate was extracted and analyzed

separately. For each extraction 2 g (wet weight) of soil were processed using the PowerSoil Total RNA Isolation and DNA Elution Accessory Kits (MoBio, Carlsbad, CA) as per manufacturer's instructions, with slight modifications. Bead beating was done in a Geno/Grinder 2010 (SPEX SamplePrep, LLC, Metuchen, NJ) using two rounds of beating (1750 strokes/min) for 15 s with a 1 min pause in between. The total elution volume for RNA and DNA was 60 µl and 100 µl respectively. RNA was treated with DNase I (RNase-Free) (New England Biolabs, USA) as per the manufacturer's protocol. RNA quality was assessed by denaturing gel electrophoresis. RNA and DNA concentration, purity and humic acid contamination were determined using a Nanodrop Spectrophotometer, ND-1000 (Thermo Scientific). All extractions were stored at -80 °C until downstream analyses.

#### *Reverse transcription (RT)*

Triplicate cDNA conversions (technical replicates) were performed for each RNA extraction using the Maxima H Minus First Strand cDNA Synthesis Kit (Thermo Scientific) according to manufacturer's protocol. Each 20 µl reaction contained: 13 µl of RNA (208 ng Total RNA), 1 µl of random hexamers (100 pmol), 1 µl of dNTP mix (0.5 mM final conc.) and 5 µl of master mix (4 µl of 5X RT buffer and 1 µl Maxima H Minus reverse transcriptase). All technical replicates for a sample were combined and stored at -80°C until further analysis. All further analyses were performed on the same cDNA pool for each sample.

#### *16S rRNA gene amplicon sequencing*

16S rRNA gene amplicon sequencing was performed using primers 515F/806R (V4 region of the 16S gene) and the Earth Microbiome Project conditions (Version 4\_13) (Caporaso *et al.*, 2012). All samples were run simultaneously on a single Illumina MiSeq run. Sequences were first processed in Qiime (version 1.9.1) using default parameters (Caporaso *et al.*, 2010). Sequences were clustered into Operational Taxonomic Units (OTUs) at 97% sequence similarity using the SILVA (version 119) reference library (Quast *et al.*, 2012) and UCLUST (Edgar, 2010) following the open-reference Operational Taxonomic Unit (OTU) picking protocol. Taxonomic identification was done using BLAST against the SILVA database (max-e value = 0.001) (Altschul *et al.*, 1990). Subsampling and rarefactions (10 times) were performed to equal read depths of 7,400 per sample, and samples below that threshold were removed. After rarefaction, all 10 OTU tables were merged and exported for further processing in R (R Development Core Team, 2008). The 16S amplicon sequences are available in the NCBI SRA database (accession numbers SRP091980).

#### *Quantification of gene and transcript abundance*

Quantitative PCR (qPCR) was performed in 384-well plates using the ViiA7 real-time PCR system (Applied Biosystems, Carlsbad, CA). Absolute quantification was done using a 10-fold serial dilution ( $10^8$  to  $10^1$ ) of known copy numbers of pGEM-T easy (Promega, Madison, Wisconsin, USA) cloned templates as standards. For all targets qPCR runs included cloned standards, no template control and no reverse transcription controls (RNA) run in triplicate. No inhibition or positive amplification on negative controls was observed for any target. All DNA and cDNA samples were run in quadruplicates to determine abundance of: prokaryotes (16S

rRNA gene), ammonia oxidizers (archaeal [AOA] & bacterial [AOB] ammonia monooxygenase gene; *amoA*), denitrifiers (cytochrome cd1-type nitrite reductase gene; *nirS*, and Clade I nitrous oxide reductase gene; *nosZI*) and nitrogen fixers (nitrogenase gene; *nifH*).

All reactions were performed in 10 µl volumes containing: 1× Master Mix (Fast SYBR Green Master Mix, ABI), 0.2-0.6 µM of each primer [0.2 µM for AOA (Tourna *et al.*, 2008), 0.6 µM for AOB (Avrahami *et al.*, 2003); 0.5 µM for 16S rRNA (Hartman *et al.*, 2009); *nirS* (Throbäck *et al.*, 2004; Yergeau *et al.*, 2007), *nosZI* (Henry *et al.*, 2006) & *nifH* (Rösch and Bothe, 2005)], 2 µl of template [DNA (1 ng total) or cDNA (80× diluted RT reaction, i.e. total 0.13 ng RNA)] and autoclaved Milli-Q H<sub>2</sub>O to a final volume of 10 µl. Primers and qPCR conditions are summarized in Table S1. A melt curve analysis (95°C for 15 s, 60°C for 1 min then increasing 0.05°C/s (data acquisition) until 95°C) was performed to test for specificity and to confirm no amplification in the negative controls.

#### *Statistical analyses*

All statistical analyses were performed in R (R Development Core Team, 2008) using the phyloseq (McMurdie and Holmes, 2013), pvcust (Suzuki and Shimodaira, 2006), vegan (Oksanen *et al.*) and mpmcorrelogram packages. Detailed descriptions can be found in supplemental methods.

#### *Growth rate estimation and prediction of rRNA operon (rrn) copy numbers*

rrn copy numbers for identified OTUs were predicted using the ribosomal RNA operon copy number database (rrnDB) (Stoddard *et al.*, 2015). For each OTU,

information from the closest strain available was selected. In instances where a closely related organism was not available, the mean copy number for the closest taxonomic group (i.e. genus, class, etc.) was used. Copy numbers were then compared to the maximum observed abundance and the maximum observed fold change (calculated based on lowest observed abundance for the same organism in a preceding time point for OTUs showing growth or succeeding time points for those decreasing in abundance). An estimated growth rate was calculated for OTUs showing increases in population size in response to N using the following formula:

$$N_t = N_0 * e^{rt}$$

where:  $N_t$ : The amount at time t;  $N_0$ : The amount at time 0; r: exponential growth rate;  
t: Time passed

#### *Fit model for rrn copy numbers*

Both non-linear (Michaelis-Menten) and linear regressions were used to fit rrn copy numbers and population changes (i.e. maximum abundance and fold-change), and growth rate (per day). The fit model was performed in R using “drc” and “ggplot2” packages.

#### **Acknowledgements**

This work was funded by the New Zealand Government through the New Zealand Fund for Global Partnerships in Livestock Emissions Research to support the objectives of the Livestock Research Group of the Global Research Alliance on Agricultural Greenhouse Gases (Agreement number: 16084) awarded to SEM and the University of Otago.

## 527 References

- 528 Abdelmohsen, U.R., Grkovic, T., Balasubramanian, S., Kamel, M.S., Quinn, R.J., and  
529 Hentschel, U. (2015) Elicitation of secondary metabolism in actinomycetes.  
530 *Biotechnology Advances* **33**: 798–811.
- 531 Altschul, S.F., Gish, W., Miller, W., Myers, E.W., and Lipman, D.J. (1990) Basic  
532 local alignment search tool. *J Mol Biol* **215**: 403–410.
- 533 Avrahami, S., Liesack, W., and Conrad, R. (2003) Effects of temperature and  
534 fertilizer on activity and community structure of soil ammonia oxidizers. *Environ*  
535 *Microbiol* **5**: 691–705.
- 536 Bai, Y., Wu, J., Clark, C.M., Naeem, S., and Pan, Q. (2010) Tradeoffs and thresholds  
537 in the effects of nitrogen addition on biodiversity and ecosystem functioning:  
538 evidence from inner Mongolia Grasslands. *Glob Change Biol* **16**: 358–372.
- 539 Baral, K.R., Thomsen, A.G., Olesen, J.E., and Petersen, S.O. (2014) Controls of  
540 nitrous oxide emission after simulated cattle urine deposition. *Agr Ecosyst*  
541 *Environ* **188**: 103–110.
- 542 Barka, E.A., Vatsa, P., Sanchez, L., Gaveau-Vaillant, N., Jacquard, C., Klenk, H.P., et  
543 al. (2015) Taxonomy, Physiology, and Natural Products of Actinobacteria.  
544 *Microbiol Mol Biol R* **80**: 1–43.
- 545 Bayer, B., Vojvoda, J., Offre, P., Alves, R.J.E., Elisabeth, N.H., Garcia, J.A., et al.  
546 (2015) Physiological and genomic characterization of two novel marine  
547 thaumarchaeal strains indicates niche differentiation. **10**: 1051–1063.
- 548 Brenzinger, K., Dörsch, P., and Braker, G. (2015) pH-driven shifts in overall and  
549 transcriptionally active denitrifiers control gaseous product stoichiometry in  
550 growth experiments with extracted bacteria from soil. *Front Microbiol* **6**: 1226.
- 551 Brewer, T., Handley, K., Carini, P., Gibert, J., and Fierer, N. (2016) Genome  
552 reduction in an abundant and ubiquitous soil bacterial lineage.
- 553 Butterbach-Bahl, K., Baggs, E.M., Dannenmann, M., Kiese, R., and Zechmeister-  
554 Boltenstern, S. (2013) Nitrous oxide emissions from soils: how well do we  
555 understand the processes and their controls? *Phil Trans R Soc B* **368**: 20130122–  
556 20130122.
- 557 Caporaso, J.G., Kuczynski, J., Stombaugh, J., Bittinger, K., Bushman, F.D., Costello,  
558 E.K., et al. (2010) QIIME allows analysis of high-throughput community  
559 sequencing data. *Nat Meth* **7**: 335–336.
- 560 Caporaso, J.G., Lauber, C.L., Walters, W.A., Berg-Lyons, D., Huntley, J., Fierer, N.,  
561 et al. (2012) Ultra-high-throughput microbial community analysis on the Illumina  
562 HiSeq and MiSeq platforms. *ISME J* **6**: 1621–1624.
- 563 Clough, T.J., Lanigan, G.J., de Klein, C.A.M., Samad, M.S., Morales, S.E., Rax, D.,  
564 et al. (n.d.). Influence of soil moisture on co-denitrification fluxes from a urea-  
565 affected pasture soil. In Review.
- 566 de Klein, C.A., Shepherd, M.A., and van der Weerden, T.J. (2014) Nitrous oxide  
567 emissions from grazed grasslands: interactions between the N cycle and climate  
568 change — a New Zealand case study. *Curr Opin Environ Sustain* **9-10**: 131–139.
- 569 de Klein, C.A.M., Luo, J., Woodward, K.B., Styles, T., Wise, B., Lindsey, S., and  
570 Cox, N. (2014) The effect of nitrogen concentration in synthetic cattle urine on  
571 nitrous oxide emissions. *Agr Ecosyst Environ* **188**: 85–92.
- 572 De Schrijver, A., De Frenne, P., Ampoorter, E., Van Nevel, L., Demey, A., Wuyts,  
573 K., and Verheyen, K. (2011) Cumulative nitrogen input drives species loss in  
574 terrestrial ecosystems. *Global Ecology and Biogeography* **20**: 803–816.
- 575 Delmont, T.O., Eren, A.M., Maccario, L., Prestat, E., Esen, Ö.C., Pelletier, E., et al.



- (2015) Reconstructing rare soil microbial genomes using in situ enrichments and metagenomics. *Front Microbiol* **6**: 1–15.
- Dethlefsen, L. and Schmidt, T.M. (2007) Performance of the translational apparatus varies with the ecological strategies of bacteria. *J Bacteriol* **189**: 3237–3245.
- Di, H.J., Cameron, K.C., Shen, J.-P., Winefield, C.S., O'Callaghan, M., Bowatte, S., and He, J.-Z. (2010) Ammonia-oxidizing bacteria and archaea grow under contrasting soil nitrogen conditions. *Fems Microbiol Ecol* **72**: 386–394.
- Di, H.J., Cameron, K.C., Shen, J.P., Winefield, C.S., O'Callaghan, M., Bowatte, S., and He, J.Z. (2009) Nitrification driven by bacteria and not archaea in nitrogen-rich grassland soils. *Nature Geoscience* **2**: 621–624.
- Dietrich, L.E.P., Okegbe, C., Price-Whelan, A., Sakhtah, H., Hunter, R.C., and Newman, D.K. (2013) Bacterial Community Morphogenesis Is Intimately Linked to the Intracellular Redox State. *J Bacteriol* **195**: 1371–1380.
- Edgar, R.C. (2010) Search and clustering orders of magnitude faster than BLAST. *Bioinformatics* **26**: 2460–2461.
- Felske and Akkermans (1998) Prominent occurrence of ribosomes from an uncultured bacterium of the Verrucomicrobiales cluster in grassland soils. *Letters in Applied Microbiology* **26**: 219–223.
- Fierer, N., Bradford, M.A., and Jackson, R.B. (2007) Toward an ecological classification of soil bacteria. *Ecology* **88**: 1354–1364.
- Gong, P., Zhang, L., Wu, Z., Shang, Z., and Li, D. (2013) Does the nitri cation inhibitor dicyandiamide affect the abundance of ammonia-oxidizing bacteria and archaea in a Hap-Udic Luvisol? *J Soil Sci Plant Nutr* **13**: 35–42.
- Gubry-Rangin, C., Kratsch, C., Williams, T.A., McHardy, A.C., Embley, T.M., Prosser, J.I., and Macqueen, D.J. (2015) Coupling of diversification and pH adaptation during the evolution of terrestrial Thaumarchaeota. *Proc Nat Acad Sci* **112**: 9370–9375.
- Hamonts, K., Balaine, N., Moltchanova, E., Beare, M., Thomas, S., Wakelin, S.A., et al. (2013) Influence of soil bulk density and matric potential on microbial dynamics, inorganic N transformations, N<sub>2</sub>O and N<sub>2</sub> fluxes following urea deposition. *Soil Biol Biochem* **65**: 1–11.
- Harpole, W.S., Sullivan, L.L., Lind, E.M., Firn, J., Adler, P.B., Borer, E.T., et al. (2016) Addition of multiple limiting resources reduces grassland diversity. *Nature* **537**: 93–96.
- Hartman, A.L., Lough, D.M., Barupal, D.K., Fiehn, O., Fishbein, T., Zasloff, M., and Eisen, J.A. (2009) Human gut microbiome adopts an alternative state following small bowel transplantation. *Proc Nat Acad Sci* **106**: 17187–17192.
- Hartsock, A. and Shapleigh, J.P. (2011) Physiological Roles for Two Periplasmic Nitrate Reductases in *Rhodobacter sphaeroides* 2.4.3 (ATCC 17025). *J Bacteriol* **193**: 6483–6489.
- Hatzenpichler, R. (2012) Diversity, physiology, and niche differentiation of ammonia-oxidizing archaea. *Appl Environ Microb* **78**: 7501–7510.
- Henry, S., Bru, D., Stres, B., Hallet, S., and Philippot, L. (2006) Quantitative detection of the *nosZ* gene, encoding nitrous oxide reductase, and comparison of the abundances of 16S rRNA, *narG*, *nirK*, and *nosZ* genes in soils. *Appl Environ Microb* **72**: 5181–5189.
- Herrero, M., Henderson, B., Havlík, P., Thornton, P.K., Conant, R.T., Smith, P., et al. (2016) Greenhouse gas mitigation potentials in the livestock sector. *Nature Climate Change* **6**: 452–461.
- Ho, A., Kerckhof, F.-M., Luke, C., Reim, A., Krause, S., Boon, N., and Bodelier,



- P.L.E. (2012) Conceptualizing functional traits and ecological characteristics of methane-oxidizing bacteria as life strategies. *Environmental Microbiology Reports* **5**: 335–345.
- Jia, Z. and Conrad, R. (2009) Bacteria rather than Archaea dominate microbial ammonia oxidation in an agricultural soil. *Environ Microbiol* **11**: 1658–1671.
- Klappenbach, J.A., Dunbar, J.M., and Schmidt, T.M. (2000) rRNA Operon Copy Number Reflects Ecological Strategies of Bacteria. *Appl Environ Microb* **66**: 1328–1333.
- Leff, J.W., Jones, S.E., Prober, S.M., Barberán, A., Borer, E.T., Firn, J.L., et al. (2015) Consistent responses of soil microbial communities to elevated nutrient inputs in grasslands across the globe. *Proc Nat Acad Sci* **112**: 10967–10972.
- Leininger, S., Urich, T., Schlöter, M., Schwark, L., Qi, J., Nicol, G.W., et al. (2006) Archaea predominate among ammonia-oxidizing prokaryotes in soils. *Nature* **442**: 806–809.
- Li, C., Di, H.J., Cameron, K.C., Podolyan, A., and Zhu, B. (2016) Effect of different land use and land use change on ammonia oxidiser abundance and N<sub>2</sub>O emissions. *Soil Biol Biochem* **96**: 169–175.
- Li, Y., Katzmann, E., Borg, S., and Schuler, D. (2012) The Periplasmic Nitrate Reductase Nap Is Required for Anaerobic Growth and Involved in Redox Control of Magnetite Biomineralization in *Magnetospirillum gryphiswaldense*. *J Bacteriol* **194**: 4847–4856.
- Lipson, D.A. (2015) The complex relationship between microbial growth rate and yield and its implications for ecosystem processes. *Front Microbiol* **6**: 1–5.
- Liu, B., Liu, B., Frostegård, Å., Frostegård, Å., Bakken, L.R., and Bakken, L.R. (2014) Impaired Reduction of N<sub>2</sub>O to N<sub>2</sub> in Acid Soils Is Due to a Posttranscriptional Interference with the Expression of nosZ. *mBio* **5**: e01383–14–e01383–14.
- Liu, B., Mørkved, P.T., Frostegård, Å., and Bakken, L.R. (2010) Denitrification gene pools, transcription and kinetics of NO, N<sub>2</sub>O and N<sub>2</sub> production as affected by soil pH. *Fems Microbiol Ecol* **72**: 407–417.
- McMurdie, P.J. and Holmes, S. (2013) phyloseq: an R package for reproducible interactive analysis and graphics of microbiome census data. *PLoS ONE*.
- Morales, S.E. and Holben, W.E. (2013) Functional response of a near-surface soil microbial community to a simulated underground CO<sub>2</sub> storage leak. *PLoS ONE* **8**: e81742–10.
- Nemergut, D.R., Knelman, J.E., Ferrenberg, S., Bilinski, T., Melbourne, B., Jiang, L., et al. (2015) Decreases in average bacterial community rRNA operon copy number during succession. **10**: 1147–1156.
- Nicol, G.W., Leininger, S., Schleper, C., and Prosser, J.I. (2008) The influence of soil pH on the diversity, abundance and transcriptional activity of ammonia oxidizing archaea and bacteria. *Environ Microbiol* **10**: 2966–2978.
- Oksanen, J., Blanchet, F.G., Kindt, R., and Legendre, P. *Vegan: Community Ecology Package* (2013) R package version 2.0-7. <https://cran.r-project.org/package=vegan>.
- O’Farrell, K.A. and Janssen, P.H. (1999) Detection of Verrucomicrobia in a Pasture Soil by PCR-Mediated Amplification of 16S rRNA Genes. *Appl Environ Microb* **65**: 4280–4284.
- Pratscher, J., Dumont, M.G., and Conrad, R. (2011) Ammonia oxidation coupled to CO<sub>2</sub> fixation by archaea and bacteria in an agricultural soil. pp. 4170–4175.
- Prosser, J.I. and Nicol, G.W. (2012) Archaeal and bacterial ammonia-oxidisers in soil:

676 the quest for niche specialisation and differentiation. *Trends in Microbiology* **20**:  
677 523–531.

678 Quast, C., Pruesse, E., Yilmaz, P., Gerken, J., Schweer, T., Yarza, P., et al. (2012)  
679 The SILVA ribosomal RNA gene database project: improved data processing and  
680 web-based tools. *Nucleic Acid Res* **41**: D590–D596.

681 R Development Core Team (2008) R: A language and environment for statistical  
682 computing. *R Foundation for Statistical Computing, Vienna, Austria*.

683 Rinke, C., Schwientek, P., Sczyrba, A., Ivanova, N.N., Anderson, I.J., Cheng, J.F., et  
684 al. (2013) Insights into the phylogeny and coding potential of microbial dark  
685 matter. *Nature* **499**: 431–437.

686 Rocca, J.D., Hall, E.K., Lennon, J.T., Evans, S.E., Waldrop, M.P., Cotner, J.B., et al.  
687 (2015) Relationships between protein-encoding gene abundance and  
688 corresponding process are commonly assumed yet rarely observed. **9**: 1693–1699.

689 Roller, B.R.K., Stoddard, S.F., and Schmidt, T.M. (2016) Exploiting rRNA operon  
690 copy number to investigate bacterial reproductive strategies. *Nature Microbiology*  
691 1–7.

692 Rösch, C. and Bothe, H. (2005) Improved assessment of denitrifying, N<sub>2</sub>-fixing, and  
693 total-community bacteria by terminal restriction fragment length polymorphism  
694 analysis using multiple restriction enzymes. *Appl Environ Microb* **71**: 2026–2035.

695 Sagar, S., Jha, N., Deslippe, J., Bolan, N.S., Luo, J., Giltrap, D.L., et al. (2013)  
696 Denitrification and N<sub>2</sub>O:N<sub>2</sub> production in temperate grasslands: Processes,  
697 measurements, modelling and mitigating negative impacts. *Sci Total Environ* **465**:  
698 173–195.

699 Sangwan, P., Kovac, S., Davis, K.E.R., Sait, M., and Janssen, P.H. (2005) Detection  
700 and cultivation of soil verrucomicrobia. *Appl Environ Microb* **71**: 8402–8410.

701 Simon, J. and Klotz, M.G. (2013) Diversity and evolution of bioenergetic systems  
702 involved in microbial nitrogen compound transformations. *Biochimica et*  
703 *Biophysica Acta (BBA)-Bioenergetics* **1827**: 114–135.

704 Song, L., Bao, X., Liu, X., and Zhang, F. (2012) Impact of nitrogen addition on plant  
705 community in a semi-arid temperate steppe in China. *Journal of Arid Land* **4**: 3–  
706 10.

707 Song, L., Bao, X., Liu, X., Zhang, Y., Christie, P., Fangmeier, A., and Zhang, F.  
708 (2011) Nitrogen enrichment enhances the dominance of grasses over forbs in a  
709 temperate steppe ecosystem. *Biogeosciences* **8**: 2341–2350.

710 Spiro, S. (2012) Nitrous oxide production and consumption: regulation of gene  
711 expression by gas-sensitive transcription factors. *Phil Trans R Soc B* **367**: 1213–  
712 1225.

713 Stahl, D.A. and la Torre, de, J.R. (2012) Physiology and diversity of ammonia-  
714 oxidizing archaea. *Annu. Rev. Microbiol.* **66**: 83–101.

715 Stempfhuber, B., Richter-Heitmann, T., Regan, K.M., Kölbl, A., Wüst, P.K., Marhan,  
716 S., et al. (2016) Spatial Interaction of Archaeal Ammonia-Oxidizers and Nitrite-  
717 Oxidizing Bacteria in an Unfertilized Grassland Soil. *Front Microbiol* **6**: 861–15.

718 Sterngren, A.E., Hallin, S., and Bengtson, P. (2015) Archaeal ammonia oxidizers  
719 dominate in numbers, but bacteria drive gross nitrification in N-amended  
720 grassland soil. *Front Microbiol* **6**: 1620–8.

721 Stevenson, B.S. and Schmidt, T.M. (2004) Life History Implications of rRNA Gene  
722 Copy Number in Escherichia coli. *Appl Environ Microb* **70**: 6670–6677.

723 Stoddard, S.F., Smith, B.J., Hein, R., Roller, B.R.K., and Schmidt, T.M. (2015)  
724 rrnDB: improved tools for interpreting rRNA gene abundance in bacteria and  
725 archaea and a new foundation for future development. *Nucleic Acid Res* **43**:

D593–D598.

Suding, K.N., Collins, S.L., Gough, L., Clark, C., Cleland, E.E., Gross, K.L., et al. (2005) Functional- and abundance-based mechanisms explain diversity loss due to N fertilization. *Proc Nat Acad Sci* **102**: 4387–4392.

Suzuki, R. and Shimodaira, H. (2006) Pvcust: an R package for assessing the uncertainty in hierarchical clustering. *Bioinformatics* **22**: 1540–1542.

Taylor, A.E., Zeglin, L.H., Wanzek, T.A., Myrold, D.D., and Bottomley, P.J. (2012) Dynamics of ammonia-oxidizing archaea and bacteria populations and contributions to soil nitrification potentials. **6**: 2024–2032.

Throbäck, I.N., Enwall, K., Jarvis, Å., and Hallin, S. (2004) Reassessing PCR primers targeting *nirS*, *nirK* and *nosZ* genes for community surveys of denitrifying bacteria with DGGE. *Fems Microbiol Ecol* **49**: 401–417.

Tourna, M., Freitag, T.E., Nicol, G.W., and Prosser, J.I. (2008) Growth, activity and temperature responses of ammonia-oxidizing archaea and bacteria in soil microcosms. *Environ Microbiol* **10**: 1357–1364.

Venterea, R.T., Clough, T.J., Coulter, J.A., Breuillin-Sessoms, F., Wang, P., Sadowsky, M.J., and A, R.P.L. (2015) Ammonium sorption and ammonia inhibition of nitrite-oxidizing bacteria explain contrasting soil N<sub>2</sub>O production. *Sci. Rep.* **5**: 12153–15.

Waldrop, M.P. and Firestone, M.K. (2006) Response of microbial community composition and function to soil climate change. *Microb Ecol* **52**: 716–724.

Wei, W., Isobe, K., Nishizawa, T., Zhu, L., Shiratori, Y., Ohte, N., et al. (2015) Higher diversity and abundance of denitrifying microorganisms in environments than considered previously. 1–12.

Yergeau, E., Kang, S., He, Z., Zhou, J., and Kowalchuk, G.A. (2007) Functional microarray analysis of nitrogen and carbon cycling genes across an Antarctic latitudinal transect. *ISME J* **1**: 163–179.

Zeng, J., Liu, X., Song, L., Lin, X., Zhang, H., Shen, C., and Chu, H. (2016) Nitrogen fertilization directly affects soil bacterial diversity and indirectly affects bacterial community composition. *Soil Biol Biochem* **92**: 41–49.

# Figures

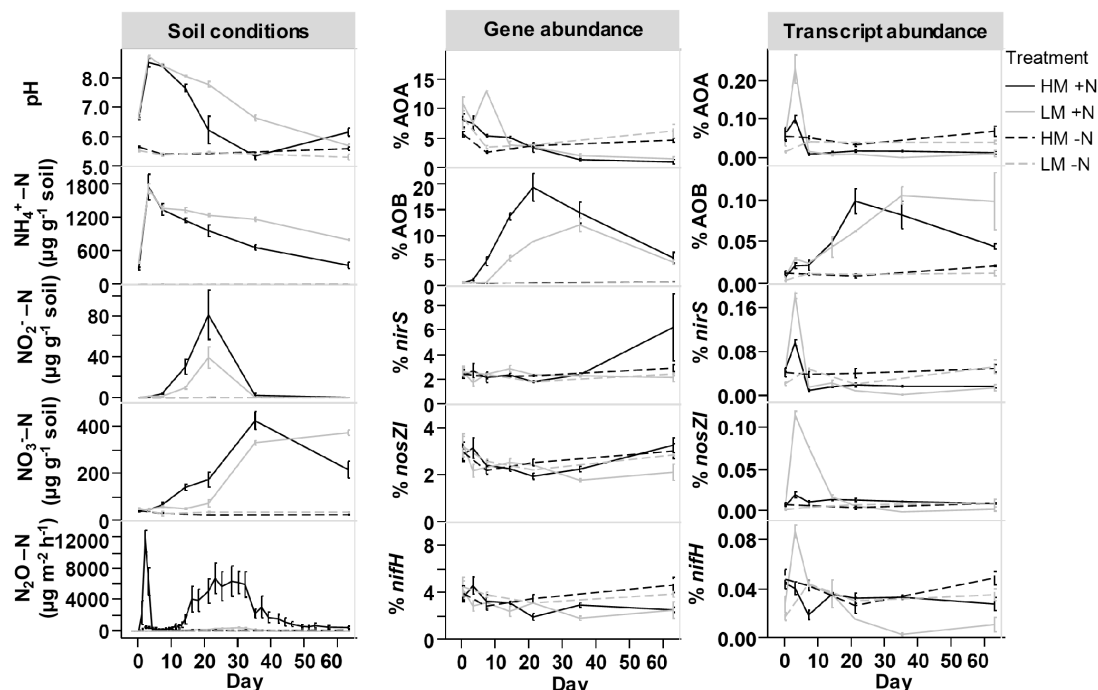

**Fig. 1** Chemical transformations and biological (functional group) response in soils treated with urea (+/- 1000  $\mu\text{g N/g}$  dry soil) under two moisture conditions (LM = low moisture [-10kPa]; HM = high moisture [-1.0kPa]). Error bars are the standard error of the mean ( $n \geq 3$ , except gene abundance data of day 7 [ $n=1$ ; LM soil] and day 21 [ $n=1$ ; LM soil]) for replicate mesocosms. Gene and transcript abundance were measured by qPCR targeting: nitrifiers (AOA, ammonia oxidizing archaea; AOB, ammonia oxidizing bacteria), denitrifiers (*nirS*, cytochrome cd<sub>1</sub>-containing nitrite reductase; *nosZI*, nitrous oxide reductase) and nitrogen fixers (*nifH*, nitrogenase reductase). All qPCR results are normalized to 16S rRNA copy numbers and presented as percent of the nucleic acid pool.

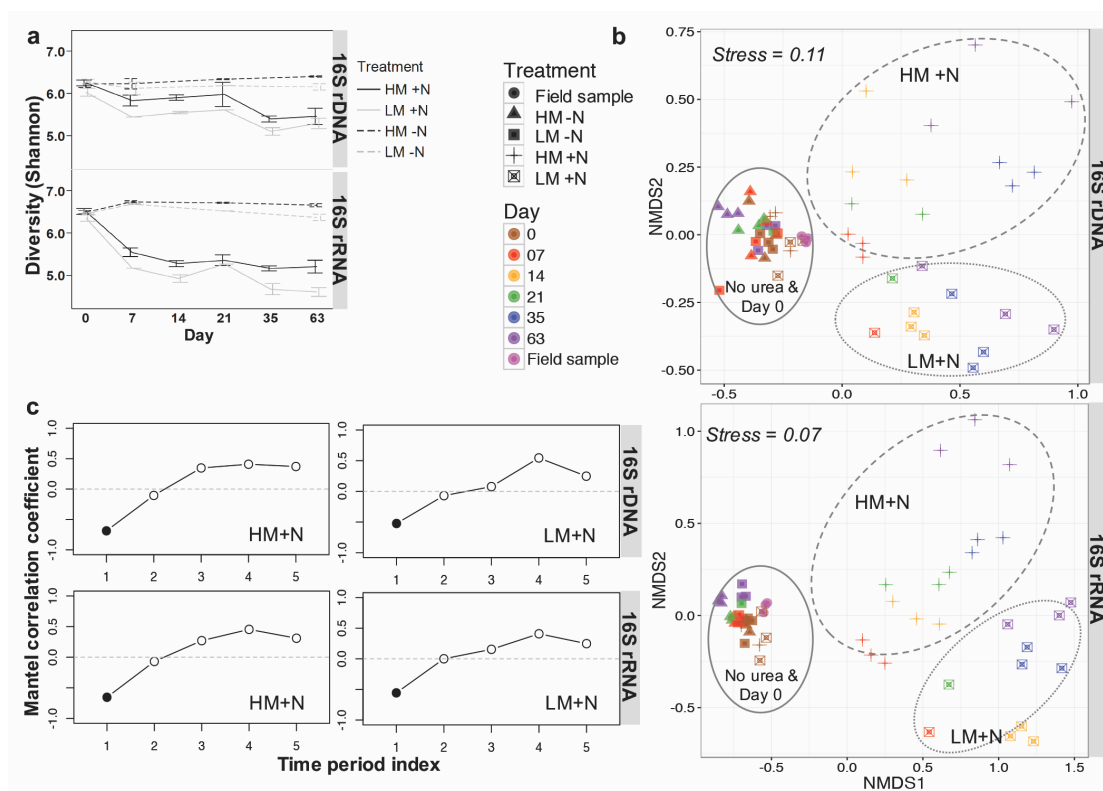

**Fig. 2** Total microbial community response (based on 16S rRNA gene amplicon profiling and clustering of sequences at OTU level (97% sequence similarity)) to urea (+/-1000 µg N/g dry soil) under two moisture conditions (LM = low moisture [-10kPa]; HM = high moisture [-1.0kPa]) at both DNA and RNA level. Error bars are the standard error of the mean (n = 3, except day 7 [n=1; LM soil] and day 21 [n=1; LM soil]) for replicate mesocosms. (a) Changes in microbial diversity (Shannon) index over time in response to treatment. (b) Non-metric multidimensional scaling (NMDS) ordination plots based on Bray-Curtis distances showing relationships among samples based on OTU level changes in community composition. (c) Mantel correlogram showing autocorrelation on community composition by performing sequential Mantel tests between the Bray-Curtis dissimilarities and the grouping of samples using a time period index (index 1 represents 0-7 days; 2 represents 7-14; 3 represents 14-21; 4 represents 21-35; 5 represents 35-63). Filled circles represent

significant correlation ( $p < 0.05$ ) in community composition at specific time periods,  
with open circles indicating no significant correlation.

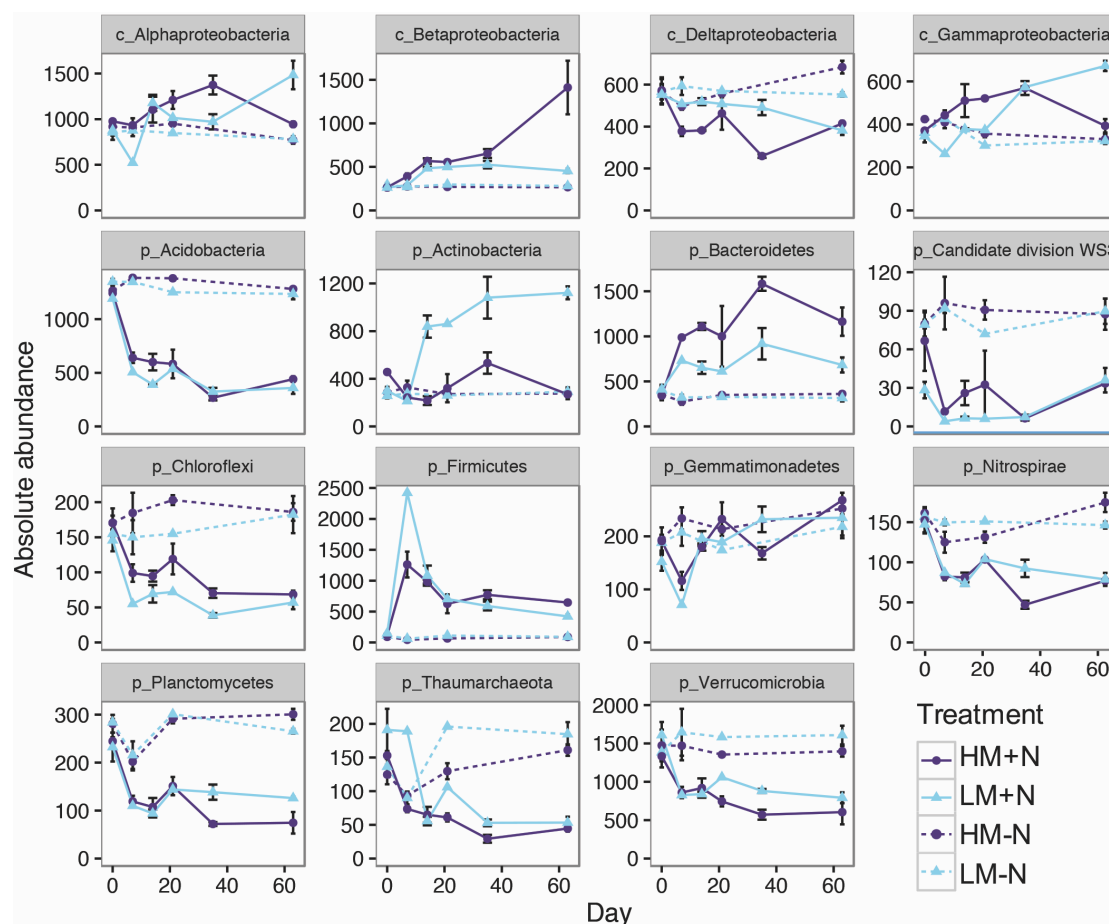

**Fig. 3** Phylum and class level (for Proteobacteria only) changes in abundance (DNA) representing relative contribution >1% of all detected phyla (based on OTUs clustered at 97% sequence similarity). A total of 7,400 sequences were examined per sample. Error bars are the standard error of the mean ( $n = 3$ , except day 7 [ $n=1$ ; LM soil] and day 21 [ $n=1$ ; LM soil]) for replicate mesocosms. Treatments = +/- N [ $\pm 1000 \mu\text{g N/g}$  dry soil] under two moisture conditions (LM = low moisture [ $-10\text{kPa}$ ]; HM = high moisture [ $-1.0\text{kPa}$ ]). Abbreviations: c: Class; p: Phylum. See supplemental Fig. S8 for relative abundance.



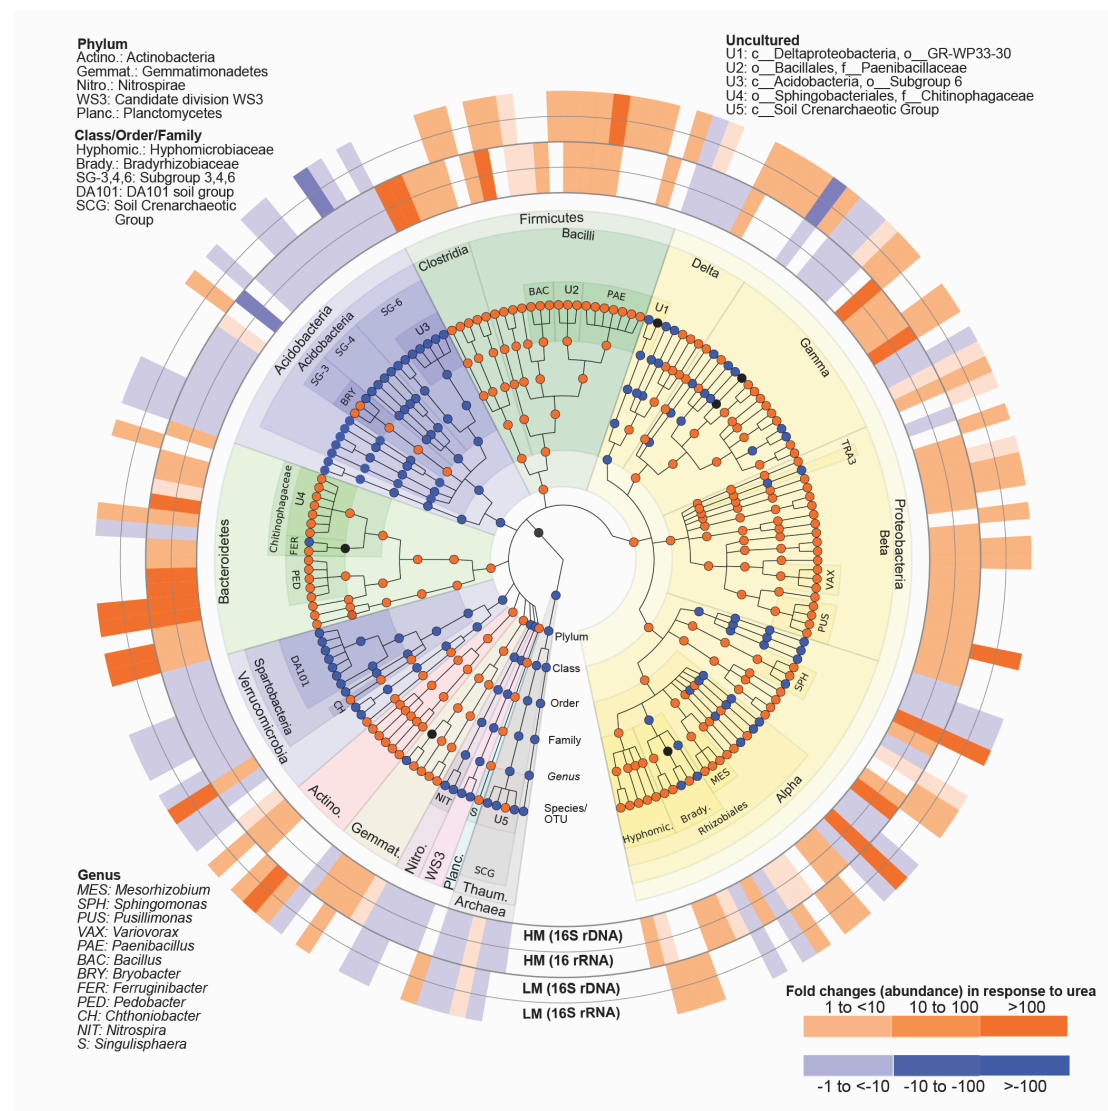

**Fig. 4** Taxonomic summary of OTUs responsive to urea treatment identified through similarity percentages (SIMPER) analysis (representing top 50% cumulative sum). The 4 outer rings represent fold changes in response to urea under high and low moisture content (MH & LM respectively) at either DNA or RNA level, with blank gaps indicating OTUs not identified in SIMPER analysis under the specified ring condition. Nodes on the tree (moving outwards from center) correspond to taxonomic level [Domain, Phylum, Class, Order, Family, Genus and Species/OTUs]. Nodes are colored based on dominant response (>50% conserved fold change response across OTUs within a node) with black nodes indicating equal representation of positive and

negatively responding OTUs. Shaded areas of branches delineate defined taxonomic groups. See Supplementary file (Table S3) for full classification.

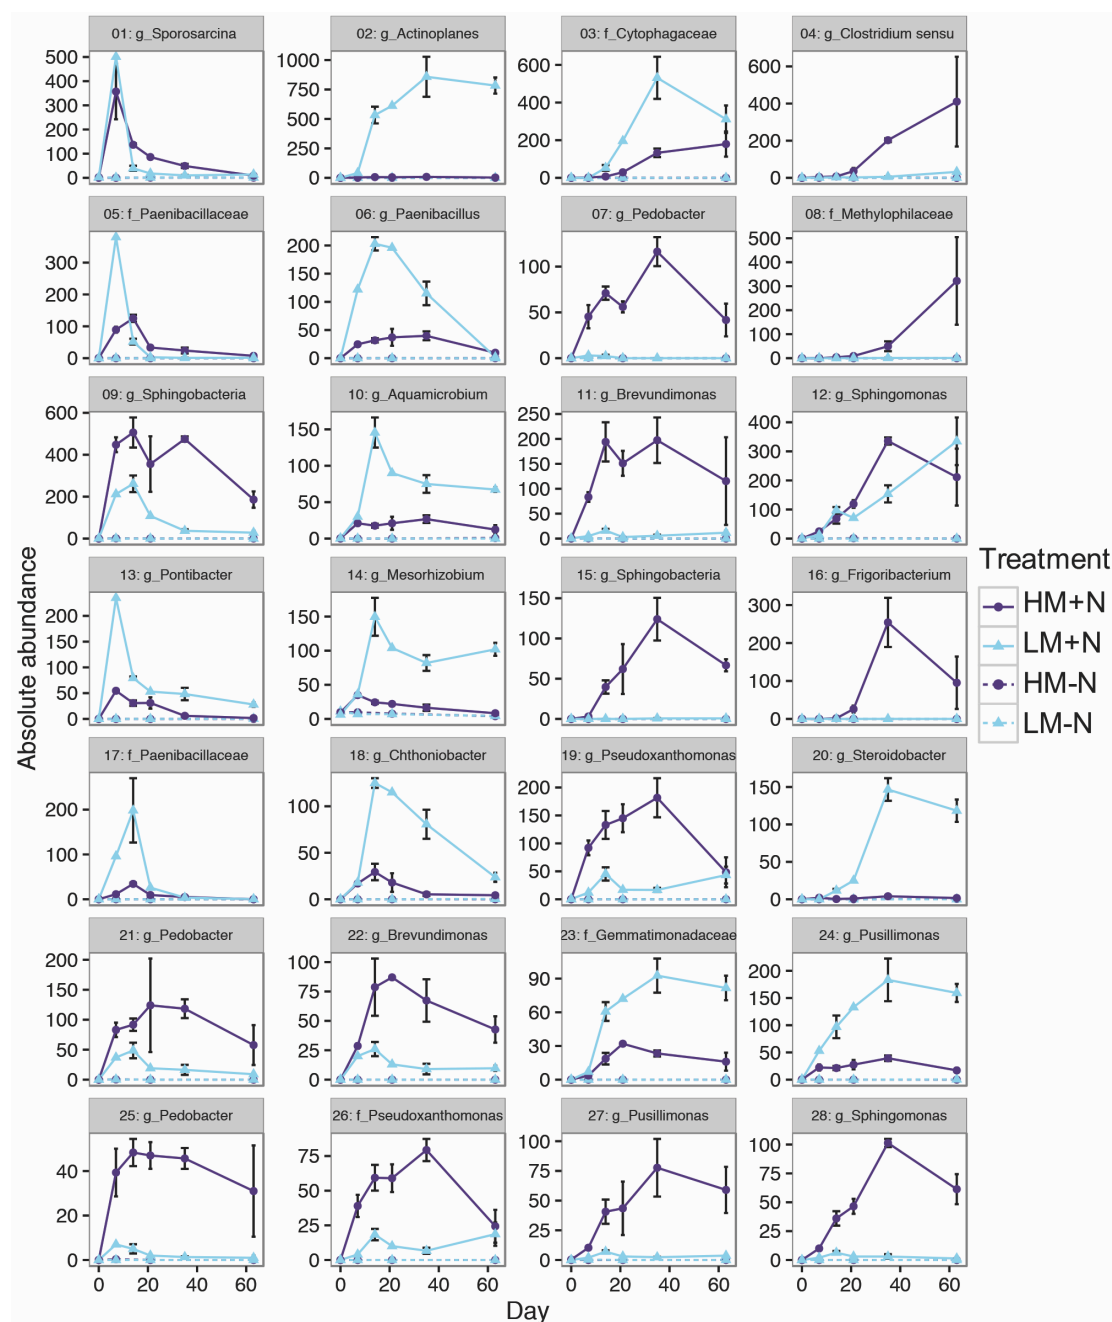

**Fig. 5** Population (16S rDNA) changes (absolute abundance based on 7400 reads per samples) for OTUs identified as positively responsive to urea treatment based on similarity percentages (SIMPER) analysis (representing top 30% cumulative sum).



Treatments = +/- N [ $\pm 1000 \mu\text{g N/g dry soil}$ ] under two moisture conditions (LM = low moisture [ $-10\text{kPa}$ ]; HM = high moisture [ $-1.0\text{kPa}$ ]).

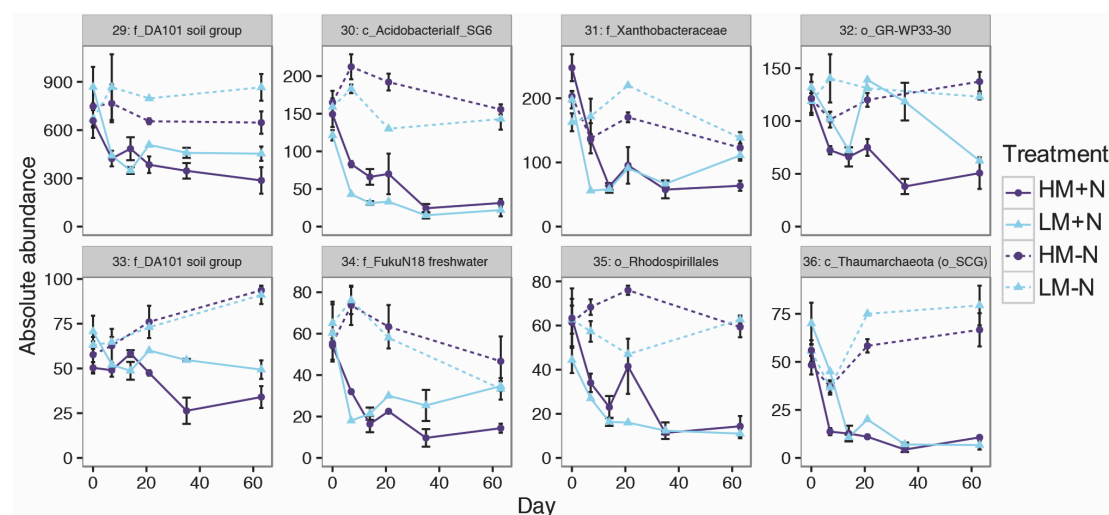

**Fig. 6** Population (16S rDNA) changes (absolute abundance based on 7,400 reads per samples) for OTUs identified as negatively responsive to urea treatment based on similarity percentages (SIMPER) analysis (representing top 30% cumulative sum). Treatments = +/- N [ $\pm 1000 \mu\text{g N/g dry soil}$ ] under two moisture conditions (LM = low moisture [ $-10\text{kPa}$ ]; HM = high moisture [ $-1.0\text{kPa}$ ]).

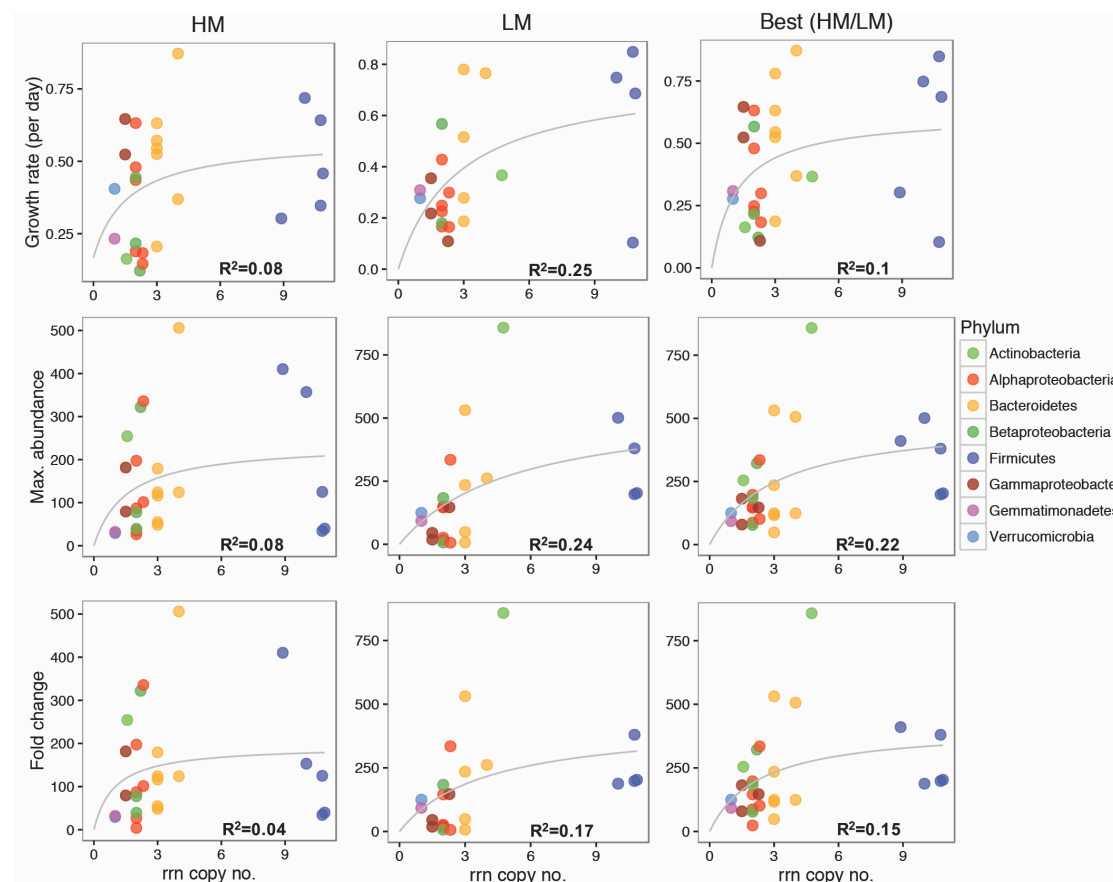

**Fig. 7** Relationship between predicted ribosomal RNA operon (rrn) copy numbers and growth rate (per day), maximum observed population change, or fold change in response to N treatment under both high moisture (HM) content, low moisture (LM) content and best growth either in HM or in LM (based on maximum observed growth). Copy number was estimated using rrn database (Stoddard *et al.*, 2015). Copy number values were obtained by finding the closest match (lowest taxonomic level possible) to each OTU and retrieving the mean rRNA copy number for that group.
